# Supplementary material for: Inhibition of NFAT5‐Dependent Astrocyte Swelling Alleviates Neuropathic Pain
Source: PubMed Central journal article supplement (PMC10953562; doi:10.1002/advs.202302916), 2024-01-09
Supplement: ADVS-11-2302916-s001.pdf [file ADVS-11-2302916-s001.pdf]

## Supporting Information

for *Adv. Sci.*, DOI 10.1002/adv.202302916

Inhibition of NFAT5-Dependent Astrocyte Swelling Alleviates Neuropathic Pain

*Liqiong He, Shengyun Ma, Zijin Ding, Zhifeng Huang, Yu Zhang, Caiyun Xi, Kailu Zou, Qingwei Deng, Wendy Jia Men Huang, Qulian Guo and Changsheng Huang\**

## Supplementary Materials

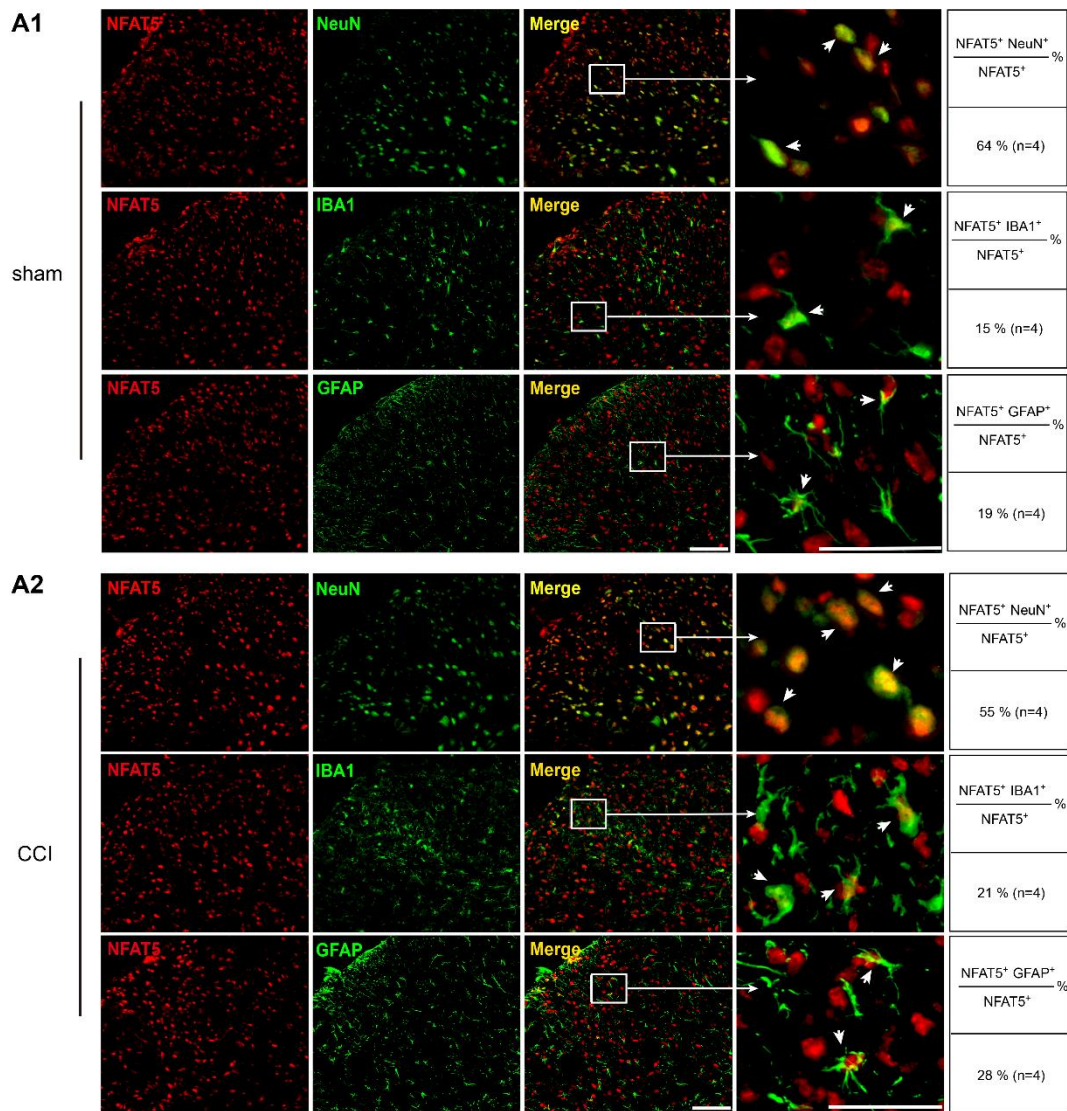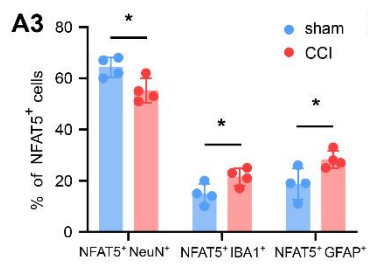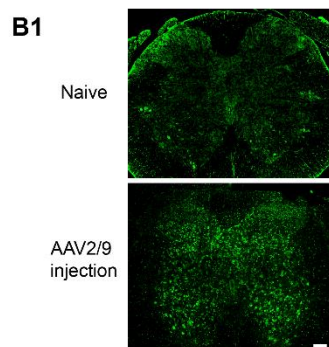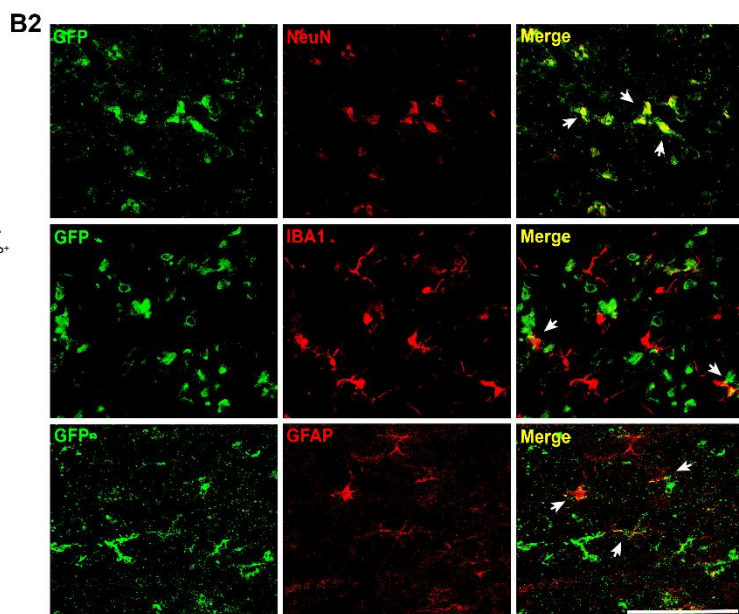

**Figure. S1 NFAT5 distribution in SDH cells and fluorescent images after AAV2/9 transfection.**

**(A1-A2)** Immunofluorescence double-labeling of NFAT5 (red) and indicated cell markers (green) in the SDH on day 7 after sham or CCI surgery. Quantification of cellular distribution was shown on the right (pooled from 4 rats/group). Scale bar = 100  $\mu\text{m}$ . **(A3)** Statistics of NFAT5 distribution in SDH cells on day 7 after sham or CCI surgery.  $*p < 0.05$ ,  $n = 4$ , two-tailed unpaired student's t-test. **(B1-B2)** GFP fluorescence images of spinal cord after NFAT5 non-specific AAV2/9 transfection and immunofluorescence double-labeled images of GFP (green) and various cell markers (red). Scale bar = 100  $\mu\text{m}$ .

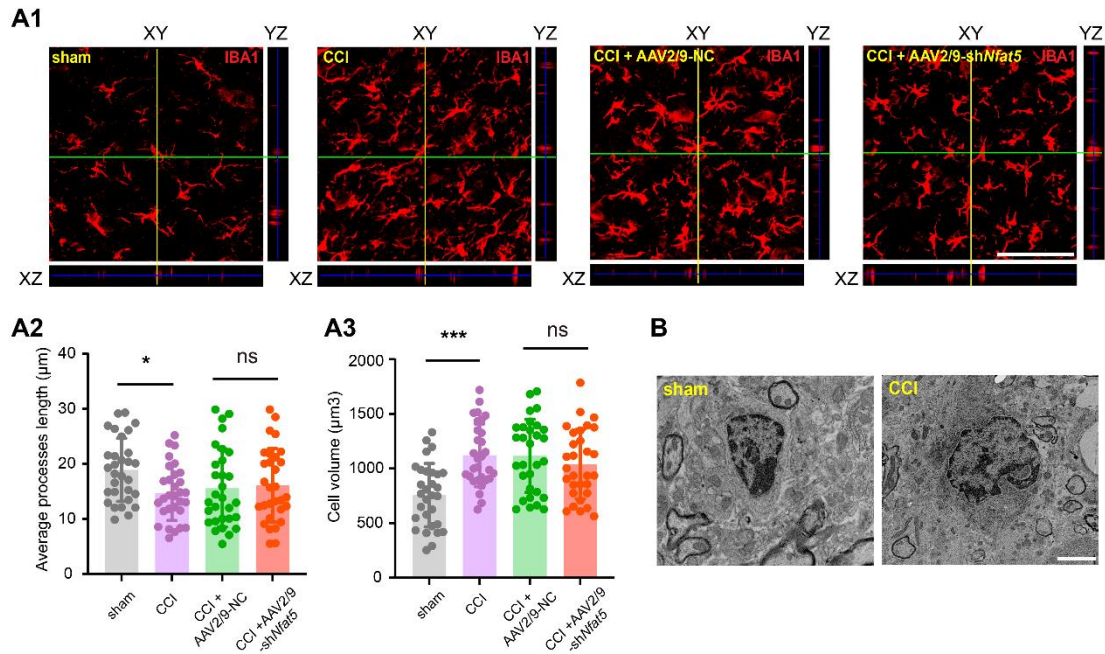

**Figure. S2 Targeting NFAT5 does not impact microglia morphology.**

**(A1-A3)** Representative 3D orthogonal confocal images (A1) and summarized morphological changes (A2-A3) of IBA1-stained microglia in indicated group of rats SDH. Scale bar = 100  $\mu\text{m}$ . CCI vs sham,  $*p < 0.05$ ,  $***p < 0.001$ ,  $n = 30$  (3 rats per group, and 10 typical cells per rat were analyzed), one-way ANOVA followed by Tukey's multiple comparison test. **(B)** Representative transmission electron microscopy images of microglia in sham and CCI groups of rats SDH. Scale bar = 2  $\mu\text{m}$ .

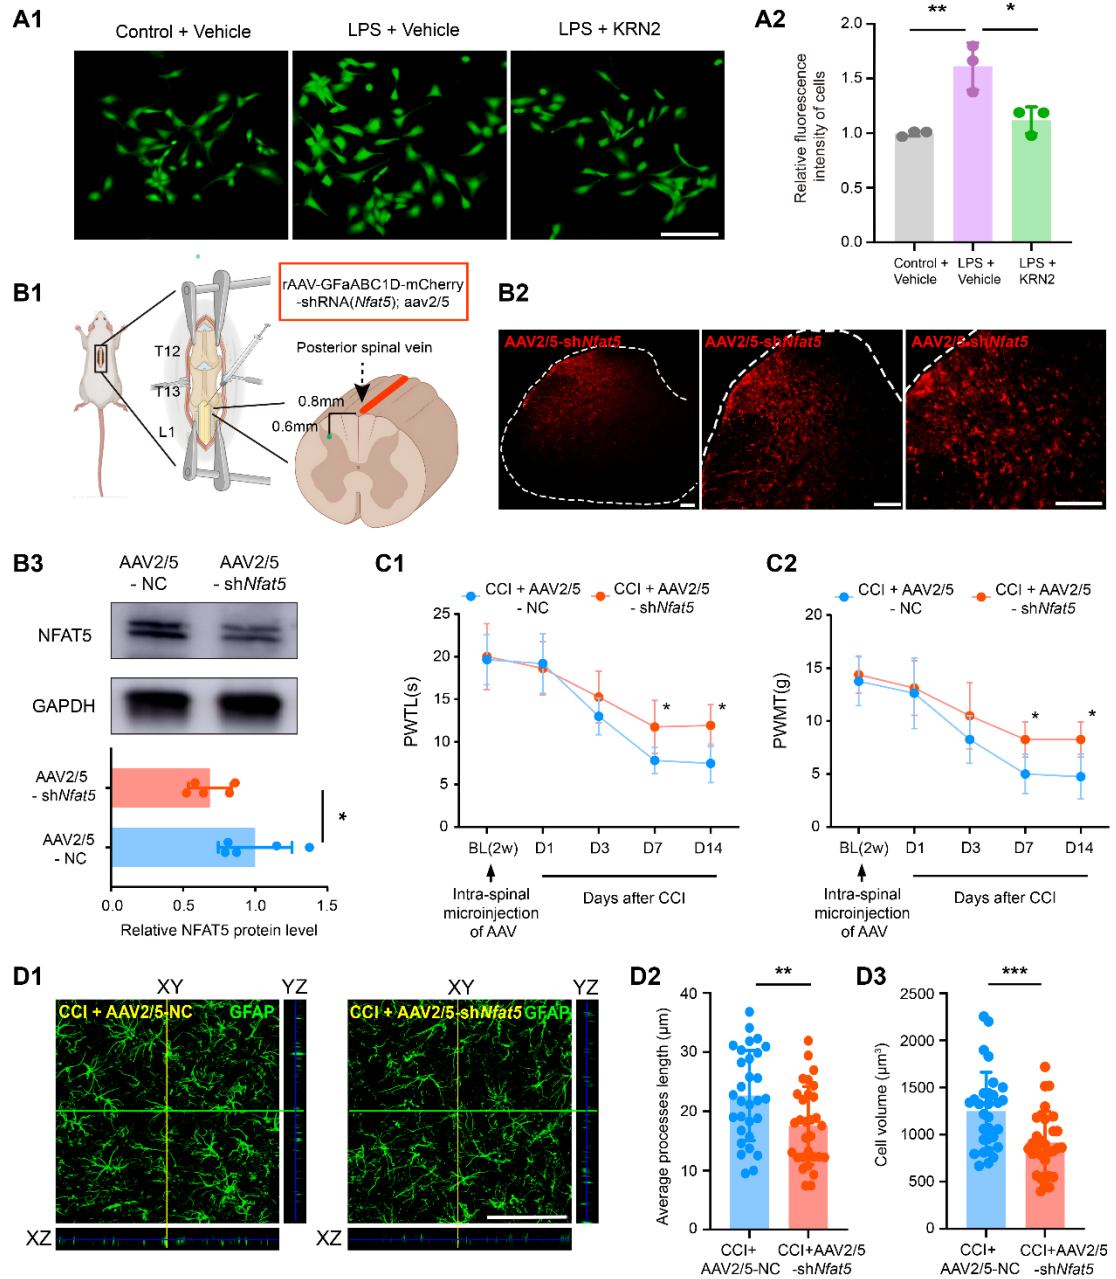

**Figure. S3 Astrocyte-specific targeting NFAT5 alleviates astrocyte swelling and neuropathic pain**

(A1-A2) Representative fluorescence images of Calcein AM signals and relative mean fluorescence intensity statistics in CTX-TNA2 cells with indicated treatments. LPS + Vehicle vs Control + Vehicle,  $**p < 0.01$ , LPS + Vehicle vs LPS + KRN2,  $*p < 0.05$ ,  $n = 3$ , one-way ANOVA followed by Tukey's multiple comparison test. (B1) Schematic diagram of intra-spinal injection of astrocytes-specific AAV2/5 knockdown of NFAT5 (AAV2/5-sh*Nfat5*). (B2) Transfected fluorescent images after intra-spinal injection of

AAV2/5-sh*Nfat5*. Scale bar = 100  $\mu\text{m}$ . **(B3)** Knockdown efficiency of NFAT5 after intra-spinal injection of AAV2/5-sh*Nfat5*.  $*p < 0.05$ ,  $n = 5$ , two-tailed unpaired student's t-test. **(C1-C2)** Behavioral tests of PWMT and PWTL after intra-spinal injection of AAV2/5-sh*Nfat5*.  $*p < 0.05$ ,  $n = 8$ , two-way ANOVA with repeated measures followed by Tukey's multiple comparison test. **(D1)** Representative 3D orthogonal confocal images of GFAP-stained astrocytes in each treatment group of rats SDH after intra-spinal injection of AAV2/5-sh*Nfat5*. Scale bar = 100  $\mu\text{m}$ . **(D2-D3)** Morphological changes (average processes length and cell volume) of GFAP-stained astrocytes in indicated treatment group of rats SDH.  $**p < 0.01$ ,  $***p < 0.001$ ,  $n = 30$  (3 rats per group, and 10 typical cells per rat were analyzed), two-tailed unpaired student's t-test.



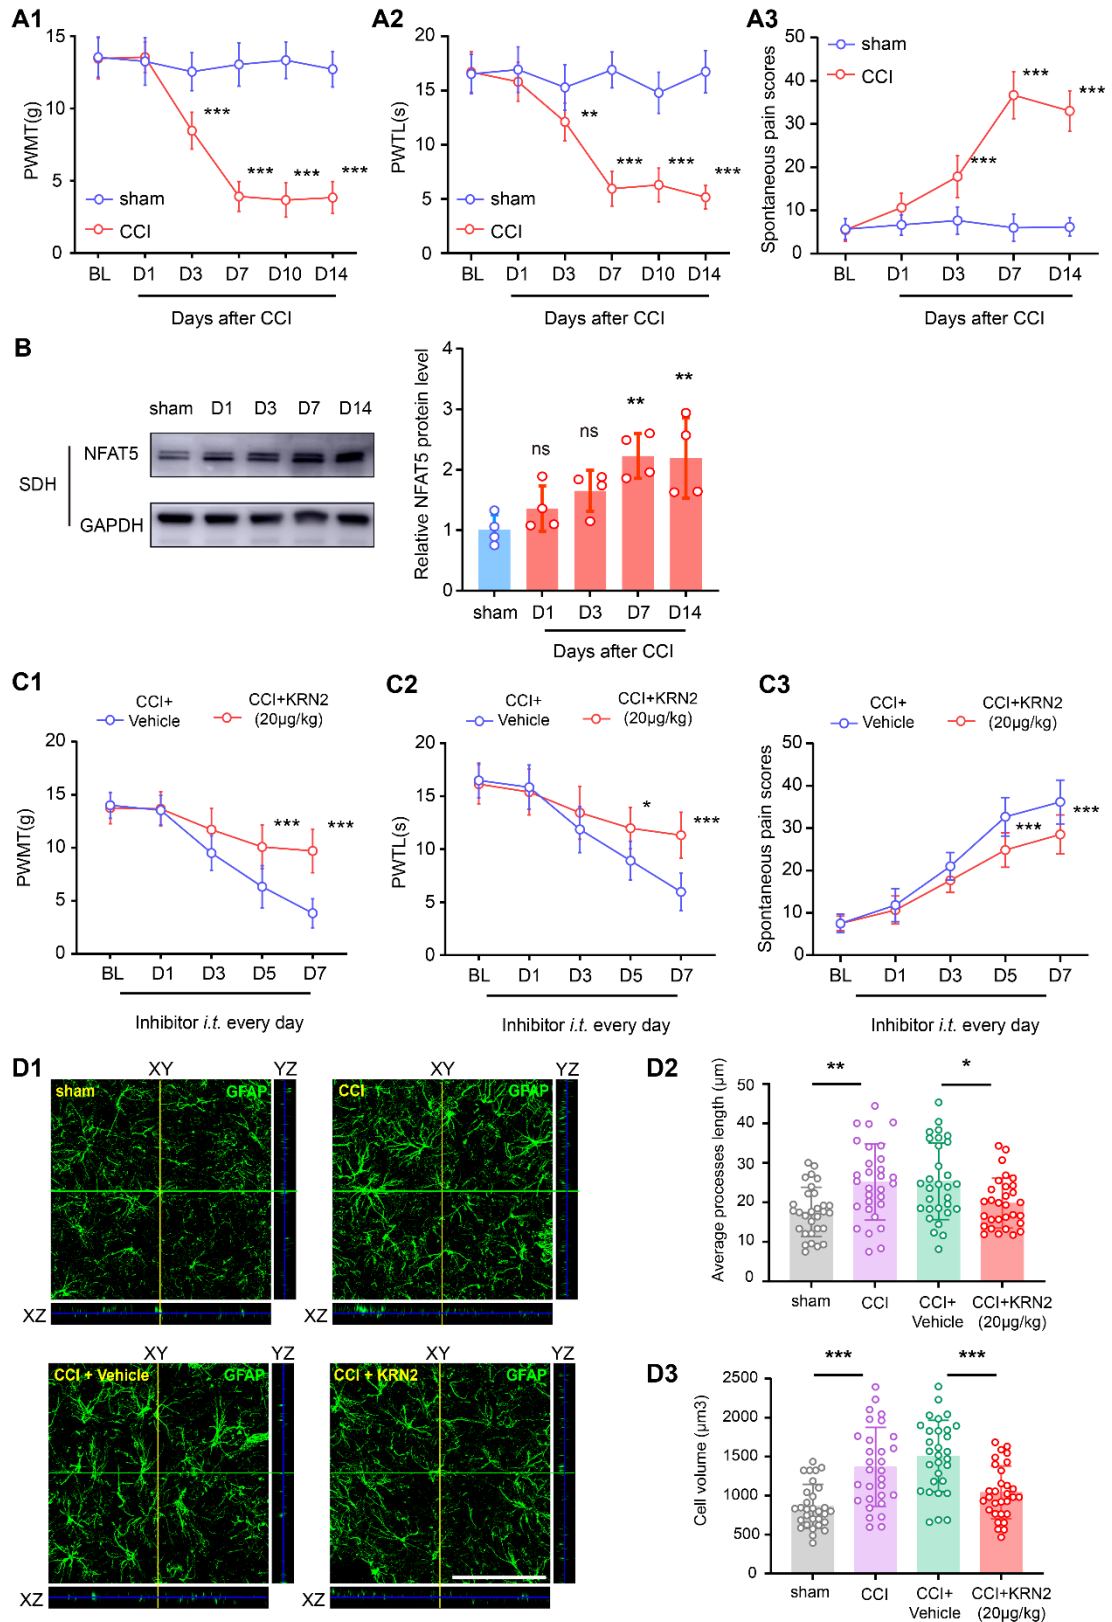

**Figure. S4 Targeting NFAT5 alleviates astrocyte swelling and neuropathic pain in female rats.**

(A1-A3) Behavioral tests of PWMT, PWTL and spontaneous pain scores in female rats

after CCI surgery.  $**p < 0.01$ ,  $***p < 0.001$ ,  $n = 8$ , two-way ANOVA with repeated measures followed by Tukey's multiple comparison test. **(B)** NFAT5 protein level in the injured ipsilateral SDH after sham or CCI surgery in female rats.  $**p < 0.01$ ,  $n = 4$ , one-way ANOVA followed by Tukey's multiple comparison test. **(C1-C3)** Behavioral tests of PWMT, PWTL and spontaneous pain scores in female rats after daily *i.t.* administration of NFAT5 inhibitor KRN2 over 7 days after CCI modeling. CCI + KRN2 (20  $\mu\text{g}/\text{kg}$ ) vs CCI + Vehicle,  $*p < 0.05$ ,  $***p < 0.001$ ,  $n = 8$ , two-way ANOVA with repeated measures followed by Tukey's multiple comparison test. **(D1)** Representative 3D orthogonal confocal images of GFAP-stained astrocytes in indicated group of female rats' SDH. Scale bar = 100  $\mu\text{m}$ . **(D2-D3)** Morphological changes (average processes length and cell volume) of astrocytes. CCI vs sham,  $**p < 0.01$ ,  $***p < 0.001$ , CCI + KRN2 (20  $\mu\text{g}/\text{kg}$ ) vs CCI + Vehicle,  $*p < 0.05$ ,  $***p < 0.001$ ,  $n = 30$  (3 rats per group, and 10 typical cells per rat were analyzed), one-way ANOVA followed by Tukey's multiple comparison test.



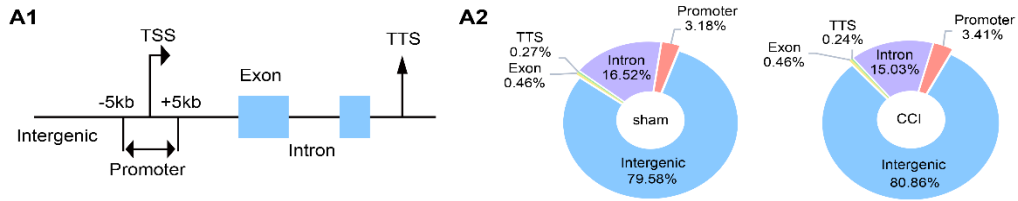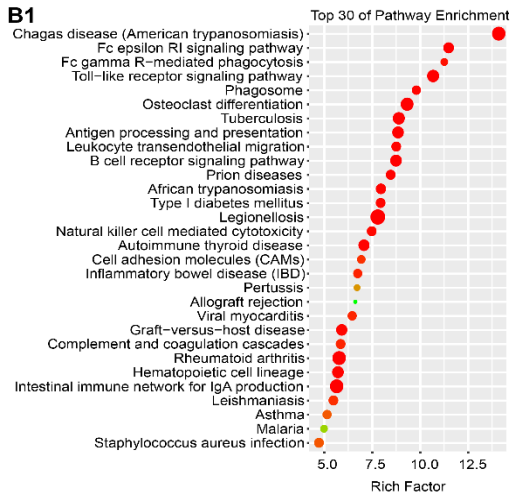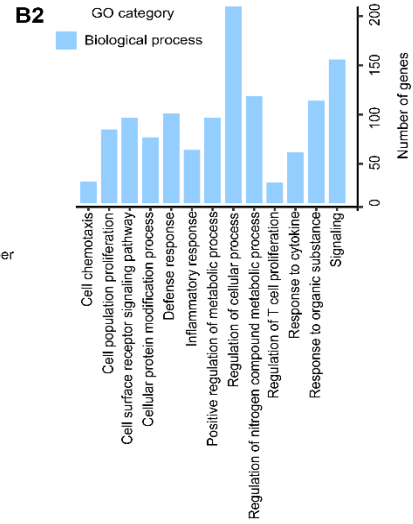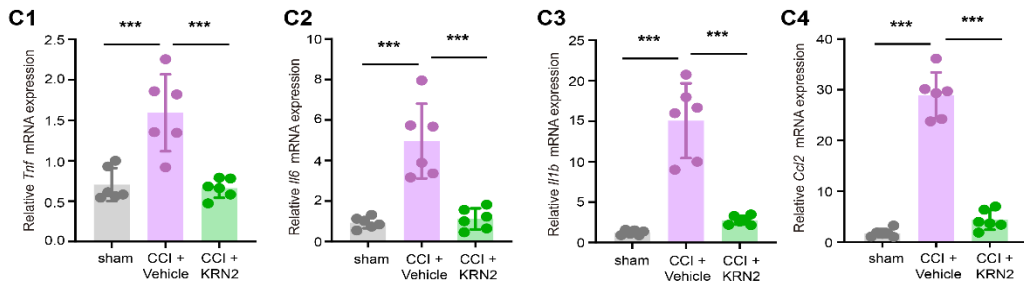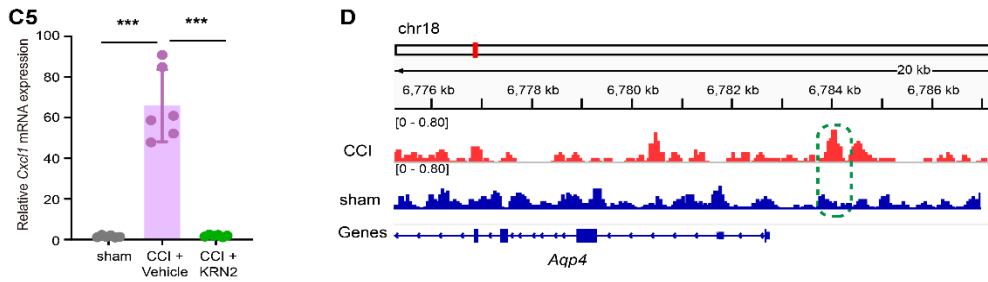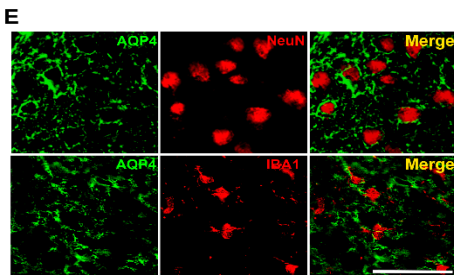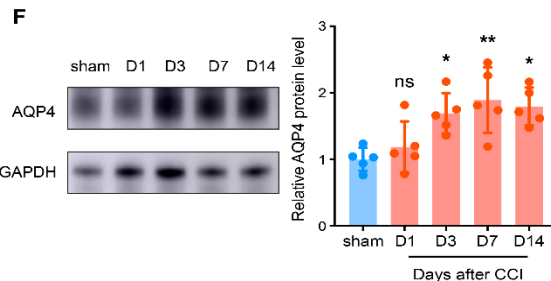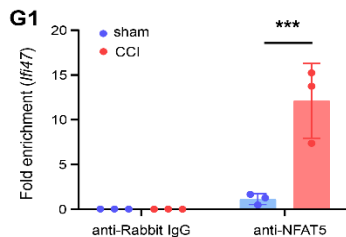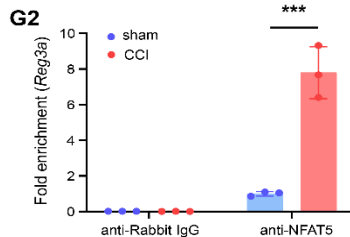

**Figure. S5 NFAT5 dependent regulation in astrocytes.**

(A1) Schematic diagram illustrating gene structures used in ChIP-seq of NFAT5 analysis. (A2) distribution of ChIP-seq peaks of NFAT5 binding sites in sham group and CCI group. Promoter = TSS  $\pm$  5 kb. (B1) KEGG enrichment analysis of differentiated expressed genes in the RNA-seq of sham and CCI rats. (B2) Gene Ontology (GO) enrichment analysis of differentiated expressed genes in the RNA-seq of sham and CCI rats. (C1-C5) Indicated mRNA expression in the SDH of CCI rats after daily intrathecal administration of NFAT5 inhibitor. CCI vs sham, \*\*\* $p < 0.001$ , CCI + KRN2 vs CCI + Vehicle, \*\*\* $p < 0.001$ ,  $n = 6$ , one-way ANOVA followed by Tukey's multiple comparison test. (D) Genome browser view of NFAT5 enrichment peaks at the *Aqp4* locus in sham and CCI groups (sham: blue. CCI: red). (E) Immunofluorescence double-labeling of AQP4 (green) and indicated cell markers (NeuN or IBA1: red) in the SDH on day 7 after CCI modeling. Scale bar = 100  $\mu$ m. (F) Expression of AQP4 protein in the injured ipsilateral SDH after sham or CCI surgery. \* $p < 0.05$ , \*\* $p < 0.01$ ,  $n = 5$ , one-way ANOVA followed by Tukey's multiple comparison test. (G1-G2) ChIP-qPCR analysis of endogenous NFAT5 binding at *Ifi47* and *Reg3a* promoters in the SDH after CCI. \*\*\* $p < 0.001$ ,  $n = 3$ , two-tailed unpaired student's t-test.

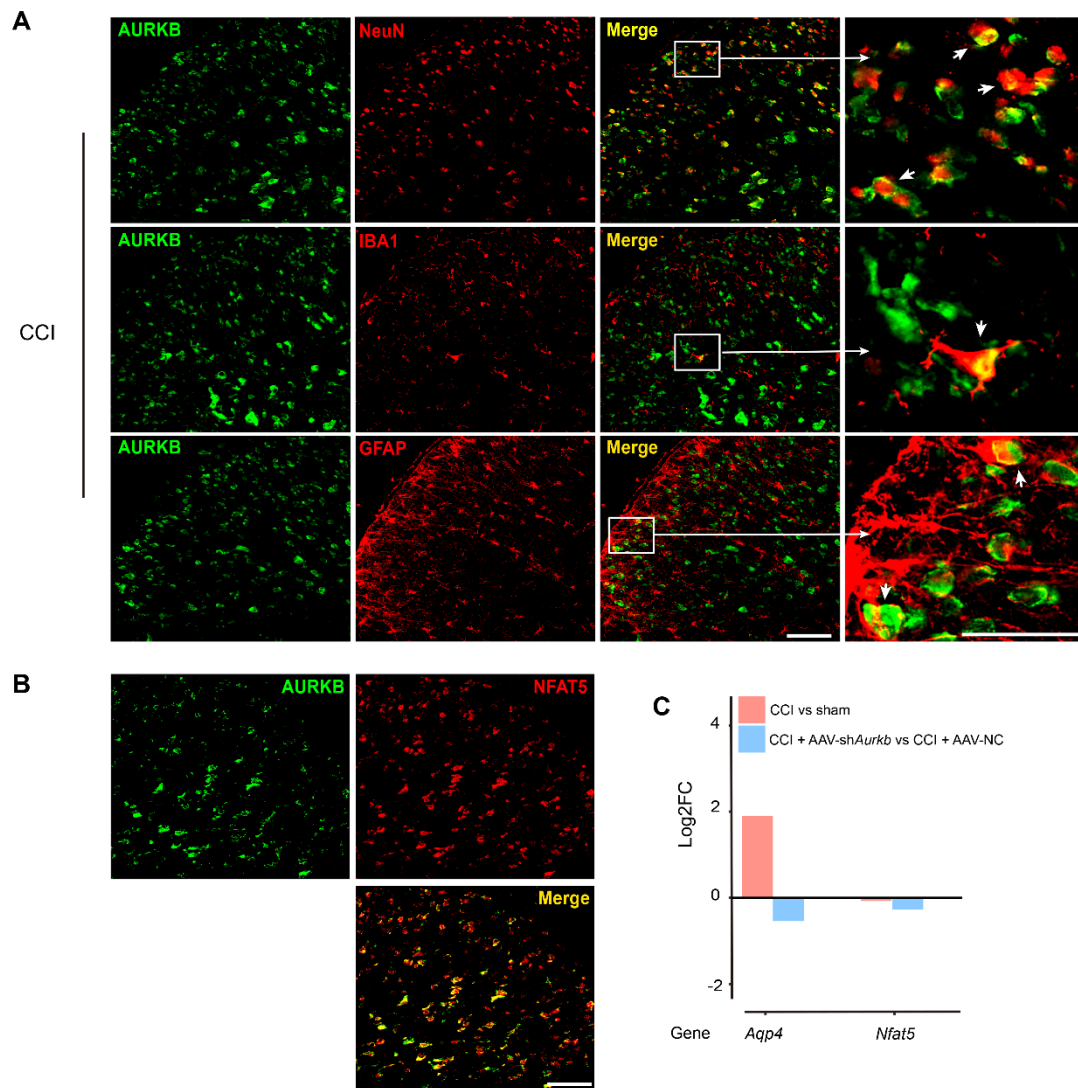

**Figure. S6 Distribution of AURKB in the SDH and its downstream gene expression.**

(A) Immunofluorescence double-labeling of AURKB (green) and indicated cell markers (NeuN, IBA1, GFAP: red) in the SDH on day 7 after CCI surgery. Scale bar = 100  $\mu$ m. (B) Double immunofluorescence staining of AURKB (green) and NFAT5 (red) in the SDH on day 7 after CCI modeling. Scale bar = 100  $\mu$ m. (C) The changed expression of *Aqp4* and *Nfat5* in the indicated rats. Log2FC: log2 fold change.

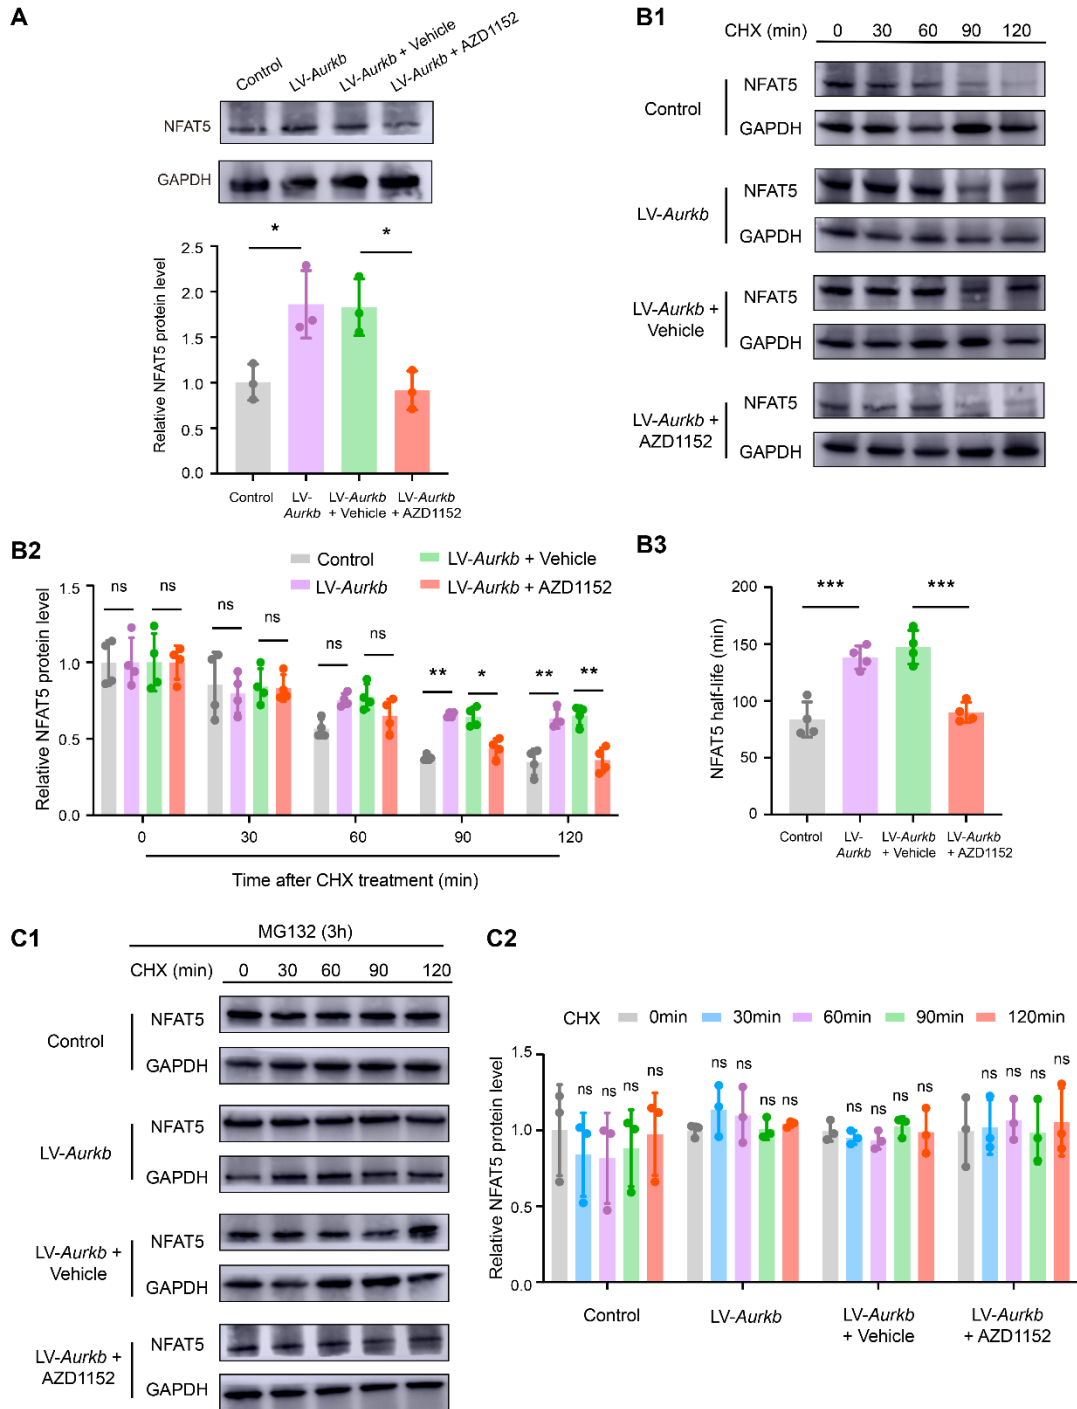

**Figure. S7 AURKB maintains NFAT5 protein stability by restricting its protein degradation.**

(A) Western blot analysis of NFAT5 in AURKB over-expressed HEK293T cells. Following transfection with LV-*Aurkb* for 72 hours, HEK293T cells were treated with the AURKB inhibitor AZD1152 for an additional 24 hours. Subsequently, Western blotting was employed to assess the total protein expression of NFAT5. Control vs LV-

*Aurkb*,  $*p < 0.05$ , LV-*Aurkb* + Vehicle vs LV-*Aurkb* + AZD1152,  $*p < 0.05$ ,  $n = 3$ , one-way ANOVA followed by Tukey's multiple comparison test. **(B1)** Time-course analysis of NFAT5 protein levels. **(B2)** Normalized NFAT5 protein levels with GAPDH at indicated time points after CHX treatment. Control vs LV-*Aurkb*,  $**p < 0.01$ , LV-*Aurkb* + AZD1152 vs LV-*Aurkb* + Vehicle,  $*p < 0.05$ ,  $**p < 0.01$ ,  $n = 4$ , two-way ANOVA followed by Tukey's multiple comparison test. **(B3)** NFAT5 half-life in the indicated treated cells. Control vs LV-*Aurkb*,  $***p < 0.001$ , LV-*Aurkb* + AZD1152 vs LV-*Aurkb* + Vehicle,  $***p < 0.001$ ,  $n = 4$ , one-way ANOVA followed by Tukey's multiple comparison test. **(C1-C2)** Time course analysis of NFAT5 protein levels in cells treated with proteasome inhibitor MG132.

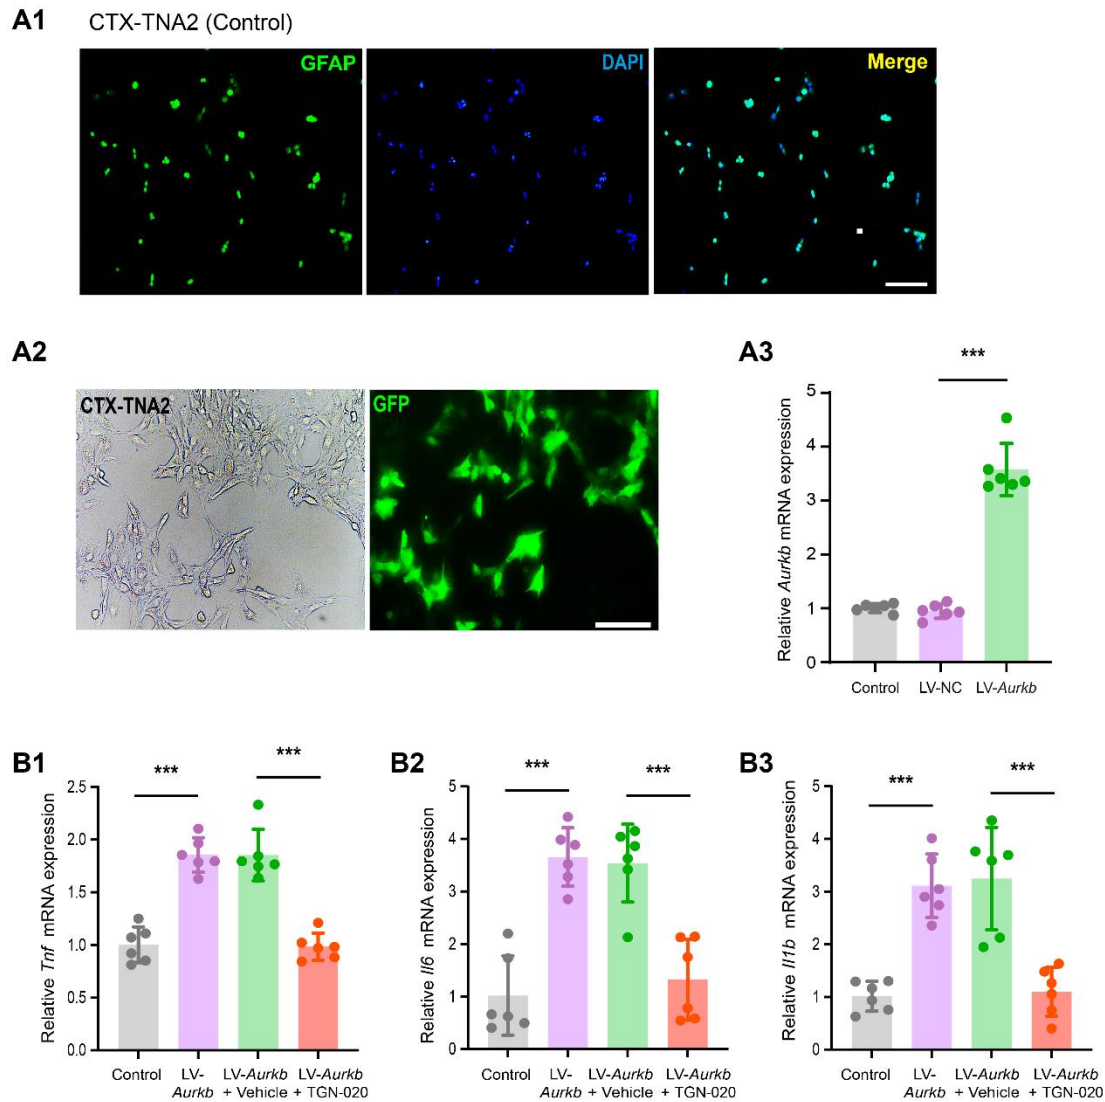

**Figure. S8 AURKB mediates astrocyte associated inflammation *in vitro*.**

(A1) GFAP immunofluorescence staining in CTX-TNA2 cell line. Scale bar = 100  $\mu$ m. (A2) Immunofluorescence staining of overexpressed lentivirus LV-*Aurkb* (GFP) in CTX-TNA2 cells. Scale bar=100  $\mu$ m. (A3) *Aurkb* mRNA level in LV-*Aurkb* transfected CTX-TNA2 cells. LV-*Aurkb* vs LV-NC, \*\*\* $p$  < 0.001,  $n$  = 6, one-way ANOVA followed by Tukey's multiple comparison test. (B1-B3) The mRNA level of indicated inflammatory factors in LV-*Aurkb* transfected CTX-TNA2 cells administered with AQP4 inhibitor TGN-020. Control vs LV-*Aurkb*, \*\*\* $p$  < 0.001, LV-*Aurkb* + Vehicle vs LV-*Aurkb* + TGN-020, \*\*\* $p$  < 0.001,  $n$  = 6, one-way ANOVA followed by Tukey's multiple comparison test.

**Table S1. The primer sequences involved in the experiment.**

| Gene         | Primer Sequence                                                                            |
|--------------|--------------------------------------------------------------------------------------------|
| <i>Nfat5</i> | Forward 5' - GGCTCCCTTCCTGCTAATCCAATG - 3'<br>Reverse 5' - GCTGCTGCTGCTGTTGTTGTTG - 3'     |
| <i>Aqp4</i>  | Forward 5' - AGTCCAAAGCAGAGGGAGATGAGG - 3'<br>Reverse 5' - GAAGGCGGTCACAGCAGAGTTC - 3'     |
| <i>Actb</i>  | Forward 5' - CATCCTGCGTCTGGAACCTGG - 3'<br>Reverse 5' - TAATGTCACGCACGATTTC - 3'           |
| <i>Tnf</i>   | Forward 5' - AAAGGACACCATGAGCACGGAAAG - 3'<br>Reverse 5' - CGCCACGAGCAGGAATGAGAAG - 3'     |
| <i>Il1b</i>  | Forward 5' - AATCTCACAGCAGCATCTCGACAAG - 3'<br>Reverse 5' - TCCACGGGCAAGACATAGGTAGC - 3'   |
| <i>Il6</i>   | Forward 5' - AGTTGCCTTCTGGGACTGATGTTG - 3'<br>Reverse 5' - GGTATCCTCTGTGAAGTCTCCTCTCC - 3' |
| <i>Ccl2</i>  | Forward 5' - CTCACCTGCTGCTACTCATTCACTG - 3'<br>Reverse 5' - CCTGCTGCTGGTATTCTTTGTAG - 3'   |
| <i>Cxcl1</i> | Forward 5' - CCAATGAGCTGCGCTGTCACTG - 3'<br>Reverse 5' - TGCGGCATCACCTTCAAACCT - 3'        |

**Table S2. NFAT5-related information in the single cell database.**

| Disease                                | Tissue                          | Cell Type          | Gene  | Variable Name | Value | Paper ID(PMID) |
|----------------------------------------|---------------------------------|--------------------|-------|---------------|-------|----------------|
| Alzheimer Disease (AD)                 | Prefrontal Cortex (PFC)         | Excitatory neurons | NFAT5 | logFC         | 0.04  | 31042697       |
| Multiple Sclerosis (MS)                | Cortical and subcortical lesion | Astrocytes         | NFAT5 | logFC         | 1.11  | 31316211       |
| Age-related Macular Degeneration (AMD) | Eye                             | Microglia          | NFAT5 | logFC         | -0.03 | 31653841       |

**Table S3. ChIP-seq quality control related data.**

| Samples ID | Raw reads | Raw bases   | Clean reads | Clean bases | Average length | Clean reads % | Clean bases % |
|------------|-----------|-------------|-------------|-------------|----------------|---------------|---------------|
| CCI 1      | 28526414  | 4278962100  | 28194908    | 3889287028  | 137.94         | 98.84%        | 90.89%        |
| CCI 2      | 60121576  | 9018236400  | 59292510    | 8174587188  | 137.87         | 98.62%        | 90.65%        |
| CCI 3      | 62107278  | 9316091700  | 61392942    | 8465407506  | 137.89         | 98.85%        | 90.87%        |
| sham 1     | 53266578  | 7989986700  | 51961156    | 7026484153  | 135.23         | 97.55%        | 87.94%        |
| sham 2     | 30210688  | 4531603200  | 29469620    | 3973252910  | 134.83         | 97.55%        | 87.68%        |
| sham 3     | 67155992  | 10073398800 | 65294528    | 8815474162  | 135.01         | 97.23%        | 87.51%        |



**Table S4. RNA-seq quality control related data.**

| Samples ID | All reads | Mapped reads | Mapped pair reads | Mapped broken pair reads | Mapped unique reads | Mapped multi reads | Mapping ratio |
|------------|-----------|--------------|-------------------|--------------------------|---------------------|--------------------|---------------|
| CCI 1      | 37717090  | 35637363     | 34936900          | 700463                   | 35480859            | 156504             | 94.49%        |
| CCI 2      | 36260590  | 34272910     | 33554580          | 718330                   | 34111183            | 161727             | 94.52%        |
| CCI 3      | 46417410  | 43818381     | 42980918          | 837463                   | 43633387            | 184994             | 94.40%        |
| sham 1     | 39029134  | 36887910     | 36175954          | 711956                   | 36732722            | 155188             | 94.51%        |
| sham 2     | 44900980  | 42450711     | 41637324          | 813387                   | 42272597            | 178114             | 94.54%        |
| sham 3     | 41063422  | 38755091     | 38006298          | 748793                   | 38590472            | 164619             | 94.38%        |

**Table S5. The detailed information of 17 related genes overlapped by the results of ChIP-seq and RNA-seq.**

| Chr   | Start     | End       | Peak score | Promoter (+/-5K) | Distance to TSS | Nearest promoter ID | Gene name      |
|-------|-----------|-----------|------------|------------------|-----------------|---------------------|----------------|
| chr18 | 6,783,875 | 6,784,783 | 4.7        | Yes              | 1118            | NM_012825           | <i>Aqp4</i>    |
| chr17 | 46077832  | 46078112  | 4.52       | No               | 37054           | NM_001191940        | <i>Aoah</i>    |
| chr2  | 93859909  | 93860189  | 4.43       | No               | 32545           | NM_001109514        | <i>Pmp2</i>    |
| chr4  | 109473078 | 109473358 | 3.91       | Yes              | -4675           | NM_001145846        | <i>Reg3a</i>   |
| chr4  | 3153437   | 3153717   | 3.74       | No               | 110346          | NM_012589           | <i>Il6</i>     |
| chr9  | 52093252  | 52093532  | 3.65       | No               | 70097           | NM_032085           | <i>Col3a1</i>  |
| chr1  | 198817943 | 198818223 | 3.56       | No               | 73891           | NM_001033998        | <i>Itgal</i>   |
| chr4  | 155984724 | 155985004 | 3.56       | No               | -24955          | NM_001005890        | <i>Clec4a1</i> |
| chr17 | 28158082  | 28158362  | 3.56       | No               | 20660           | NM_001106128        | <i>Ly86</i>    |
| chr10 | 34278510  | 34278790  | 3.56       | Yes              | 657             | NM_172019           | <i>Ifi47</i>   |
| chr9  | 52107109  | 52107389  | 3.48       | No               | 83954           | NM_032085           | <i>Col3a1</i>  |
| chr13 | 60993624  | 60993904  | 3.48       | No               | 76758           | NM_019336           | <i>Rgs1</i>    |
| chr17 | 46307761  | 46308041  | 3.48       | No               | -192875         | NM_001191940        | <i>Aoah</i>    |
| chr17 | 46276974  | 46277254  | 3.48       | No               | -162088         | NM_001191940        | <i>Aoah</i>    |
| chr17 | 46031308  | 46031588  | 3.48       | No               | 83578           | NM_001191940        | <i>Aoah</i>    |
| chr2  | 104593827 | 104594107 | 3.39       | No               | -132104         | NM_031019           | <i>Crh</i>     |
| chr2  | 104509443 | 104509723 | 3.39       | No               | -47720          | NM_031019           | <i>Crh</i>     |
| chr2  | 192657445 | 192657725 | 3.39       | No               | 13474           | NM_021864           | <i>Sprr1a</i>  |
| chr4  | 109313986 | 109314266 | 3.39       | No               | -153146         | NM_053289           | <i>Reg3b</i>   |
| chr2  | 104509723 | 186592916 | 3.3        | No               | 12316           | NM_001107702        | <i>Fcrl2</i>   |
| chr4  | 43696143  | 43696423  | 3.3        | No               | 440532          | NM_022379           | <i>Tfec</i>    |
| chr7  | 54787681  | 54787961  | 3.3        | No               | -8998           | NM_001011987        | <i>Glipr1</i>  |
| chr4  | 43638966  | 43639246  | 3.22       | No               | 497709          | NM_022379           | <i>Tfec</i>    |
| chr9  | 52053131  | 52053411  | 3.22       | No               | 29976           | NM_032085           | <i>Cal3a1</i>  |

**Table S6. Ingenuity Pathway Analysis (IPA) results based on transcriptome sequencing data.**

| IPA group                                 | Upstream regulator | Molecule type           | Activation z-score |
|-------------------------------------------|--------------------|-------------------------|--------------------|
| CCI + AAV-sh <i>Aurkb</i> vs CCI + AAV-NC | NFAT5              | transcription regulator | -3.988             |
